# Supplementary material for: The Gcn2 Regulator Yih1 Interacts with the Cyclin Dependent Kinase Cdc28 and Promotes Cell Cycle Progression through G2/M in Budding Yeast
Source: PubMed Central journal article supplement (PMC4503747; doi:10.1371/journal.pone.0131070), 2015-07-15
Supplement: pone.0131070.s003.pdf [file pone.0131070.s003.pdf]

**Supplementary Table S1 – Yeast strains used in this study**

| Strain                     | Genotype                                                          | Source                              |
|----------------------------|-------------------------------------------------------------------|-------------------------------------|
| Genetic background: BY4741 |                                                                   |                                     |
| MSY-WT2                    | <i>MATa leu2Δ met15Δ ura3Δ0</i>                                   | [13]                                |
| MSY-Y2                     | <i>MATa leu2Δ met15Δ ura3Δ0 yih1Δ::Kan<sup>R</sup></i>            | [13]                                |
| ESY-11b                    | <i>MATa leu2Δ met15Δ ura3Δ0 yih1::Kan<sup>R</sup>Δ::YIH1-URA3</i> | [13]                                |
| VN_3198                    | <i>MATa leu2Δ his3Δ met15Δ ura3Δ0 YIH1-VN::klURA3</i>             | Korea Bioneer                       |
| VN_1325                    | <i>MATa leu2Δ his3Δ met15Δ ura3Δ0 CET1-VN::klURA3</i>             | Korea Bioneer                       |
| E57                        | <i>MATa ura3-52, lys2-801, ade2-101, trp1Δ1, his3Δ200, leu2Δ1</i> | [66]                                |
| BCY20                      | As VN_3198, and <i>CDC28-VC::his3MX6</i>                          | This study                          |
| BCY21                      | As E57, and <i>CDC28-VC::his3MX6</i>                              | This study                          |
| RRY62a                     | As VN_3198 and <i>GCN1-VC::his3MX6</i>                            | (Ramesh and Sattlegger unpublished) |
| YBR160W                    | <i>MATa leu2Δ his3Δ met15Δ ura3Δ0 CDC28-GFP::his3MX6</i>          | Life Technologies                   |
| Genetic background: H1511  |                                                                   |                                     |
| H1511                      | <i>MATα ura3-52 trp1-63 leu2-3,112 GAL2+</i>                      | [67]                                |
| ESY11001b                  | As H1511, and <i>yih1Δ::Kan<sup>R</sup></i>                       | [18]                                |
| H2556                      | As H1511, and <i>gcn1Δ</i>                                        | [12]                                |
| H2557                      | As H1511, and <i>gcn2Δ</i>                                        | [12]                                |
| ESY11071aa                 | As H1511, and <i>gcn1Δ; yih1::Kan<sup>R</sup></i>                 | [18]                                |
| ESY10075aa                 | As H1511, and <i>gcn2Δ; yih1::Kan<sup>R</sup></i>                 | This study                          |

66. Sikorski RS, Hieter P. A system of shuttle vectors and yeast host strains designed for efficient manipulation of DNA in *Saccharomyces cerevisiae*. *Genetics*. 1989;122(1):19-27. PubMed PMID: WOS:A1989U362600003.
67. Foiani M, Cigan AM, Paddon CJ, Harashima S, Hinnebusch AG. GCD2, a translational repressor of the GCN4 gene, has a general function in the initiation of protein synthesis in *Saccharomyces cerevisiae*. *Molecular and Cellular Biology*. 1991;11(6):3203-16. PubMed PMID: 2038326.
