# Supplementary material for: The Gcn2 Regulator Yih1 Interacts with the Cyclin Dependent Kinase Cdc28 and Promotes Cell Cycle Progression through G2/M in Budding Yeast
Source: PubMed Central journal article supplement (PMC4503747; doi:10.1371/journal.pone.0131070), 2015-07-15
Supplement: pone.0131070.s004.pdf [file pone.0131070.s004.pdf]

**Supplementary Table S2-** Plasmids used in this study

| Plasmid                      | Gene                               | Features                    | Vector      | Source                            |
|------------------------------|------------------------------------|-----------------------------|-------------|-----------------------------------|
| <b>Bacterial gene fusion</b> |                                    |                             |             |                                   |
| pBE718                       | GST-YIH1                           | Amp <sup>R</sup>            | pGEX-6p-3   | This study                        |
| RCB14                        | His <sub>6</sub> -Cdc28            | Amp <sup>R</sup>            | pETduet-1   | This study                        |
| <b>Yeast gene fusions</b>    |                                    |                             |             |                                   |
| pES245-6                     | GST – YIH1 (2-132)                 | Amp <sup>R</sup> , URA3, 2μ | pES128-9    | [3]                               |
| pES246-7                     | GST – YIH1 (2-171)                 | Amp <sup>R</sup> , URA3, 2μ | pES128-9    | [3]                               |
| pES247-8                     | GST – YIH1 (68-258)                | Amp <sup>R</sup> , URA3, 2μ | pES128-9    | [3]                               |
| pES248-9                     | GST – YIH1 (68-171)                | Amp <sup>R</sup> , URA3, 2μ | pES128-9    | [3]                               |
| pES249-10                    | GST – YIH1 (133-258)               | Amp <sup>R</sup> , URA3, 2μ | pES128-9    | [3]                               |
| pES187B1                     | GST – YIH1 (2-258)                 | Amp <sup>R</sup> , URA3, 2μ | pES128-9    | [3]                               |
| pES330-5-3                   | GST – YIH1 (2-258)<br>E87A; D90A   | Amp <sup>R</sup> , URA3, 2μ | pES128-9    | [3]                               |
| pES332-3-1                   | GST – YIH1 (2-258)<br>D102A; E106A | Amp <sup>R</sup> , URA3, 2μ | pES128-9    | [3]                               |
| pES234-6-2                   | GST – IMPACT                       | Amp <sup>R</sup> , URA3, 2μ | pES128-9    | [14]                              |
| <b>Mammalian gene fusion</b> |                                    |                             |             |                                   |
| pBE626                       | IMPACT-FLAG                        | Amp <sup>R</sup>            | pFLAG-CMV5a | (Roffe and Castilho, unpublished) |

\*Number in parentheses indicate amino acids encoded by Yih1
